# Supplementary material
Source: Springer Nature journal article supplement (https://www.springermedizin.de/resource/supplementary/13012_2013_747_MOESM2_ESM.pdf/9630566)
Supplement: MOESM2 [file 9630566]

Feasibility (group 1, N=40)



```
graph TD; A[Feasibility (group 1, N=40)] --> B[Acceptability (group 4, N=125)]; B --> C[Reliability: test retest & initial internal consistency (group 2, N=42)]; C --> D["Factorial validity: (group 3, N=275)"]; D --> E["Criterion validity: (group 4, N=125)"]; D --- F["➤ Internal consistency: total score and subscales (group 3, N=275)"]
```

Acceptability (group 4, N=125)

Reliability: test retest & initial internal consistency (group 2, N=42)

Factorial validity: (group 3, N=275)

- Internal consistency: total score and subscales (group 3, N=275)

Criterion validity: (group 4, N=125)
